# Supplementary material
Source: Springer Nature journal article supplement (https://www.springermedizin.de/resource/supplementary/12991_2010_1279_MOESM5_ESM.pdf/9615640)

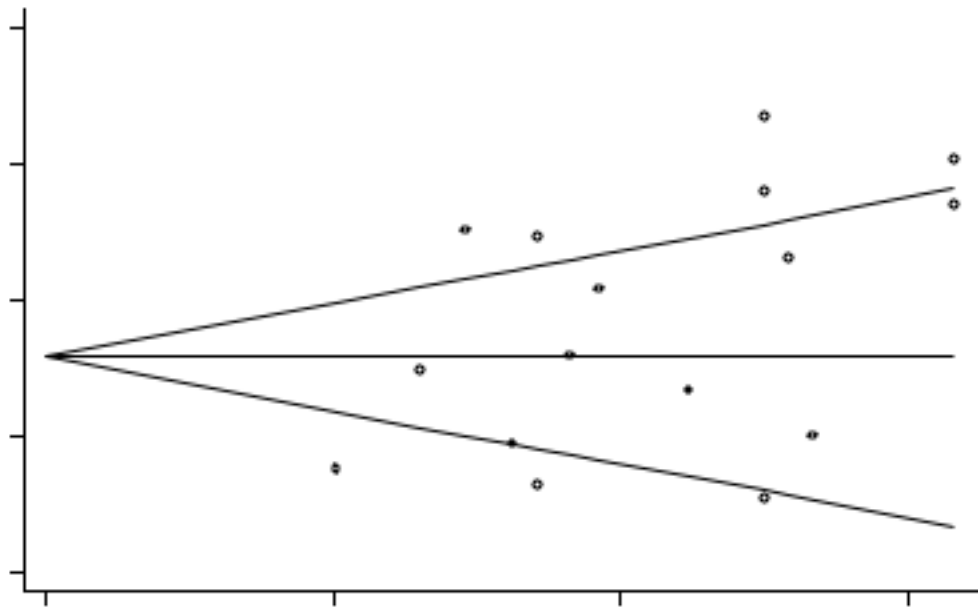

Supplement: MOESM5 [file 9615640]
